# Supplementary material for: Expansion Improved the Physical and Chemical Properties and In Vitro Rumen Digestibility of Buckwheat Straw
Source: MDPI journal article supplement (doi:10.3390/ani14010029), 2023-12-21
Supplement: s1 [file s1]

**Tables S1.** Signal assignments and relative intensities in FTIR spectra.

| Peak | Attribution and description of FTIR absorption | Wavenumber (cm <sup>-1</sup> ) |      |      |
|------|------------------------------------------------|--------------------------------|------|------|
|      |                                                | Control                        | EO   | ES   |
| 1    | Hydrogen bonded stretching absorption          | 3418                           | 3418 | 3422 |
| 2    | Aliphatic CH <sub>x</sub> stretching vibration | 2920                           | 2919 | 2918 |
| 3    | Unconjugated C=O in hemicellulose              | 1737                           | 1737 | 1736 |
| 4    | Aromatic vibration                             | 1629                           | 1636 | 1636 |
| 5    | Aromatic skeletal vibration                    | 1506                           | 1507 | 1507 |
| 6    | Aromatic vibration                             | 1425                           | 1425 | 1424 |
| 7    | C-H deformation                                | 1374                           | 1374 | 1373 |
| 8    | C-O vibration of syringyl                      | 1319                           | 1323 | 1323 |
| 9    | C-O vibration of guaiacyl                      | 1245                           | 1246 | 1246 |
| 10   | C-O-C asymmetric stretch                       | 1160                           | 1161 | 1160 |
| 11   | Aromatic C-H deformation in syringyl           | 1107                           | 1108 | 1108 |
| 12   | C-O stretch                                    | 1057                           | 1056 | 1056 |
| 13   | C-O-C stretching of amorphous cellulose        | 898                            | 897  | 897  |
| 14   | Aromatic C-H deformation out of plane          | 831                            | 829  | 828  |

**Table S2.** Changes in rheological properties.

| Items                  | Control | EO     | ES     | SEM <sup>1</sup> | P-value <sup>2</sup> |
|------------------------|---------|--------|--------|------------------|----------------------|
| Compressive stress (N) | 137.40a | 63.81b | 37.70c | 10.14            | <0.001               |
| Relaxed elasticity (%) | 62.55a  | 59.25b | 57.84b | 0.73             | 0.001                |
| Creep deformation (mm) | 6.76c   | 10.52b | 13.12a | 0.94             | <0.001               |

Control, untreated; EO, once expansion; ES, secondary expansion. <sup>1</sup>SEM represents standard error of mean, n = 3. <sup>2</sup>Significant differences in each row are indicated by different superscripts ( $P < 0.05$ ).
